# Supplementary material for: Liver cirrhosis in England—an observational study: are we measuring its burden occurrence correctly?
Source: PubMed Central journal article supplement — BMJ Open. 2017 Jul 13;7(7):e013752. doi: 10.1136/bmjopen-2016-013752 (PMC5541611; doi:10.1136/bmjopen-2016-013752), 2017-07-13
Supplement: bmjopen-2016-013752supp001.pdf [file bmjopen-2016-013752supp001.pdf]

**Supplementary Table 1 ICD -8 and ICD- 9 codes for liver disease and the three definitions of liver cirrhosis (LC)**

| ICD version  | Code | Description                                             | Liver disease | LC Definition |     |                  |
|--------------|------|---------------------------------------------------------|---------------|---------------|-----|------------------|
|              |      |                                                         |               | 1†            | 2§  | LC Definition 3¥ |
| <b>ICD-8</b> | 5700 | Acute/subacute necrosis of liver                        | Yes           | No            | No  | No               |
|              | 5710 | Cirrhosis of liver-alc                                  | Yes           | Yes           | Yes | Yes              |
|              | 5719 | Cirrhosis of liver-othe                                 | Yes           | Yes           | Yes | Yes              |
|              | 5720 | Suppurative hepatitis and liver abscess                 | Yes           | No            | No  | No               |
|              | 5730 | Other disease of liver                                  | Yes           | No            | No  | No               |
| <b>ICD-9</b> | 570  | Acute/subacute necrosis of liver                        | Yes           | No            | No  | No               |
|              | 5710 | Alcoholic fatty liver                                   | Yes           | Yes           | No  | No               |
|              | 5711 | Acute alcoholic hepatitis                               | Yes           | Yes           | No  | No               |
|              | 5712 | Alcoholic cirrhosis of liver                            | Yes           | Yes           | Yes | Yes              |
|              | 5713 | Alcoholic liver damage, unspec                          | Yes           | Yes           | No  | No               |
|              | 5714 | Chronic hepatitis                                       | Yes           | Yes           | No  | No               |
|              | 5715 | Cirrhosis of liver without mention of alcohol           | Yes           | Yes           | Yes | Yes              |
|              | 5716 | Biliary cirrhosis                                       | Yes           | Yes           | No  | Yes              |
|              | 5718 | Other chronic nonalcoholic liver disease                | Yes           | Yes           | No  | No               |
|              | 5719 | Unspec chronic liver disease without mention of alcohol | Yes           | Yes           | No  | No               |
|              | 5720 | Abscess of liver                                        | Yes           | No            | No  | No               |
|              | 5721 | Portal pyemia                                           | Yes           | No            | No  | No               |
|              | 5722 | Hepatic coma                                            | Yes           | No            | No  | No               |
|              | 5723 | Portal hypertension                                     | Yes           | No            | No  | Yes              |
|              | 5724 | Hepatorenal syndrome                                    | Yes           | No            | No  | No               |
|              | 5728 | Other sequelae of chronic liver disease                 | Yes           | No            | No  | No               |
|              | 573  | Other disorders of liver                                | Yes           | No            | No  | No               |
|              | 4560 | Oesophageal varices with bleeding                       | No            | No            | No  | Yes              |

|      |                                                      |    |    |    |     |
|------|------------------------------------------------------|----|----|----|-----|
| 4561 | Oesophageal varices without bleeding                 | No | No | No | Yes |
| 4562 | Oesophageal varices in diseases classified elsewhere | No | No | No | Yes |

---

†Leon et al.<sup>13</sup> §Jepsen et al.<sup>16</sup> ¶Ratib et al.<sup>3</sup>

**Supplementary Table 2 ICD -10 codes for liver disease and the three definitions of liver cirrhosis (LC)**

| ICD version | Code  | Description                                                  | Liver disease | LC Definition |     |                  |
|-------------|-------|--------------------------------------------------------------|---------------|---------------|-----|------------------|
|             |       |                                                              |               | 1†            | 2§  | LC Definition 3¥ |
| ICD-10      | K70.0 | Alcoholic fatty liver                                        | Yes           | Yes           | No  | No               |
|             | K70.1 | Alcoholic hepatitis                                          | Yes           | Yes           | No  | No               |
|             | K70.2 | Alcoholic fibrosis and sclerosis of liver                    | Yes           | Yes           | No  | No               |
|             | K70.3 | Alcoholic cirrhosis of liver                                 | Yes           | Yes           | Yes | Yes              |
|             | K70.4 | Alcoholic hepatic failure                                    | Yes           | Yes           | No  | No               |
|             | K70.9 | Alcoholic liver disease, unspecified                         | Yes           | Yes           | No  | No               |
|             | K71.0 | Toxic liver disease with cholestasis                         | Yes           | No            | No  | No               |
|             | K71.1 | Toxic liver disease with hepatic necrosis                    | Yes           | No            | No  | No               |
|             | K71.2 | Toxic liver disease with acute hepatitis                     | Yes           | No            | No  | No               |
|             | K71.3 | Toxic liver disease with chronic persistent hepatitis        | Yes           | No            | No  | No               |
|             | K71.4 | Toxic liver disease with chronic lobular hepatitis           | Yes           | No            | No  | No               |
|             | K71.5 | Toxic liver disease with chronic active hepatitis            | Yes           | No            | No  | No               |
|             | K71.6 | Toxic liver disease with hepatitis, not elsewhere classified | Yes           | No            | No  | No               |
|             | K71.7 | Toxic liver disease with fibrosis and cirrhosis of liver     | Yes           | No            | No  | Yes              |
|             | K71.8 | Toxic liver disease with disorders of liver                  | Yes           | No            | No  | No               |
|             | K71.9 | Toxic liver disease with disorders of liver                  | Yes           | No            | No  | No               |
|             | K72.0 | Acute and subacute hepatic failure                           | Yes           | No            | No  | No               |
|             | K72.1 | Chronic hepatic failure                                      | Yes           | No            | No  | Yes              |
|             | K72.9 | Hepatic failure, unspecified                                 | Yes           | No            | No  | No               |
|             | K73   | Chronic hepatitis, not elsewhere classified                  | Yes           | Yes           | No  | No               |

†Leon et al.<sup>13</sup> §Jepsen et al.<sup>16</sup> ¥ Ratib et al.<sup>3</sup> LC=liver cirrhosis

| ICD version | Code  | Description                                          | Liver disease | LC          | LC          | LC          |
|-------------|-------|------------------------------------------------------|---------------|-------------|-------------|-------------|
|             |       |                                                      |               | Defintion2† | Defintion2§ | Defintion3¥ |
| ICD-10      | K74.0 | Hepatic fibrosis                                     | Yes           | Yes         | No          | No          |
|             | K74.1 | Hepatic sclerosis                                    | Yes           | Yes         | No          | No          |
|             | K74.2 | Hepatic fibrosis with hepatic sclerosis              | Yes           | Yes         | No          | No          |
|             | K74.3 | Primary Biliary cirrhosis                            | Yes           | Yes         | No          | No          |
|             | K74.4 | Secondary biliary cirrhosis                          | Yes           | Yes         | No          | Yes         |
|             | K74.5 | Biliary cirrhosis, unspecified                       | Yes           | Yes         | No          | Yes         |
|             | K74.6 | Other and unspecified cirrhosis of liver             | Yes           | Yes         | Yes         | Yes         |
|             | K75   | Other inflammatory liver diseases                    | Yes           | No          | No          | No          |
|             | K76.0 | Other diseases of liver                              | Yes           | No          | No          | No          |
|             | K76.1 | Chronic passive congestion of liver                  | Yes           | No          | No          | No          |
|             | K67.2 | Central haemorrhagic necrosis of liver               | Yes           | No          | No          | No          |
|             | K76.3 | Infarction of liver                                  | Yes           | No          | No          | No          |
|             | K76.4 | Peliosis hepatis                                     | Yes           | No          | No          | No          |
|             | K76.5 | Hepatic veno-occlusive disease                       | Yes           | No          | No          | No          |
|             | K76.6 | Portal hypertension                                  | Yes           | No          | No          | Yes         |
|             | K76.7 | Hepatorenal syndrome                                 | Yes           | No          | No          | No          |
|             | K76.8 | Other specified diseases of liver                    | Yes           | No          | No          | No          |
|             | K76.9 | Liver disease, unspecified                           | Yes           | No          | No          | No          |
|             | K77   | Liver disorders in diseases classified elsewhere     | Yes           | No          | No          | No          |
|             | I85.0 | Oesophageal varices with bleeding                    | No            | No          | No          | Yes         |
|             | I85.9 | Oesophageal varices without bleeding                 | No            | No          | No          | Yes         |
|             | I86.4 | Gastric varices                                      | No            | No          | No          | Yes         |
|             | I98.2 | Oesophageal varices in diseases classified elsewhere | No            | No          | No          | Yes         |

†Leon et al.<sup>13</sup> §Jepsen et al.<sup>16</sup> ¥ Ratib et al.<sup>3</sup> LC=liver cirrhosis
